CORRECTION

# Correction: Comparison of perceptions of domestic elder abuse among healthcare workers based on the Knowledge-Attitude-Behavior (KAB) model

Qinqiuzi Yi, Naohiro Hohashi

There is an error in affiliation 1 for authors Qinqiuzi Yi and Naohiro Hohashi. Affiliation 1 should be: Division of Family Health Care Nursing, Graduate School of Health Sciences, Kobe University, Japan.

## Reference

1. Yi Q, Hohashi N (2018) Comparison of perceptions of domestic elder abuse among healthcare workers based on the Knowledge-Attitude-Behavior (KAB) model. PLoS ONE 13(11): e0206640. <https://doi.org/10.1371/journal.pone.0206640> PMID: 30383824

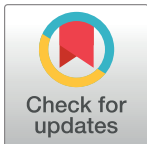

## OPEN ACCESS

**Citation:** Yi Q, Hohashi N (2019) Correction: Comparison of perceptions of domestic elder abuse among healthcare workers based on the Knowledge-Attitude-Behavior (KAB) model. PLoS ONE 14(1): e0210916. <https://doi.org/10.1371/journal.pone.0210916>

**Published:** January 14, 2019

**Copyright:** © 2019 Yi, Hohashi. This is an open access article distributed under the terms of the [Creative Commons Attribution License](https://creativecommons.org/licenses/by/4.0/), which permits unrestricted use, distribution, and reproduction in any medium, provided the original author and source are credited.
